# Supplementary material
Source: PubMed Central journal article supplement (PMC3151052)
Supplement: supp_M111.251504_jbc.M111.251504-1.pdf [file supp_M111.251504_jbc.M111.251504-1.pdf]

### **Supplemental Figure 1**

(A) FLAG-CaMKK $\beta$  was transiently over-expressed in HEK 293a cells and labeled for 4 h with 0.77 mCi/ml of  $^{32}\text{P}$ -orthophosphate. CaMKK $\beta$  was then partially purified using anti-FLAG M2-agarose. The sample was split and half was treated with  $\lambda$ -phosphatase for 1 h while the other half was left untreated. After phosphatase treatment, CaMKK $\beta$  attached to anti-FLAG M2-agarose was washed extensively before CaMKK $\beta$  was eluted using the FLAG peptide. Samples were run on a SDS-PAGE gel, silver stained, and then visualized on autoradiograph film.

(B) Bands containing CaMKK $\beta$  were cut from the gel in (A) and levels of  $^{32}\text{P}$  incorporation were measured using scintillation counting.

### **Supplemental Figure 2**

Phosphopeptide sequence of human CaMKK $\beta$  (121-142). Human FLAG-CaMKK $\beta$  was isolated by immunoprecipitation, digested with trypsin and subjected to targeted MS/MS as described in Experimental Procedures. The parent triply charged ion is marked \* (909.05); annotated a, b and y ions of the MS/MS spectrum are shown, the specific ions identifying pSer137, pSer133 and pSer129 are highlighted on the sequence.

### **Supplemental Figure 3**

FLAG-CaMKK $\alpha$  and FLAG-CaMKK $\beta$  were transiently over-expressed in HEK 293a cells. The cells were then treated as indicated with 100mM dibutryl-cAMP for 10 min before being harvested in lysis buffer. FLAG-CaMKK constructs were immunoprecipitated with anti-FLAG M2 agarose and the immunoprecipitates were blotted with a pan 14-3-3 antibody as well as a FLAG antibody as a loading control.

### **Supplemental Table 1**

Primers used for site-directed mutagenesis.

Supplemental Figure 1

A

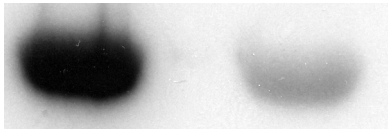

Autoradiograph

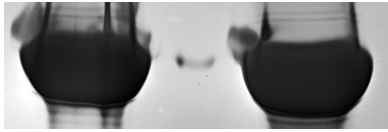

Silver Stain

B

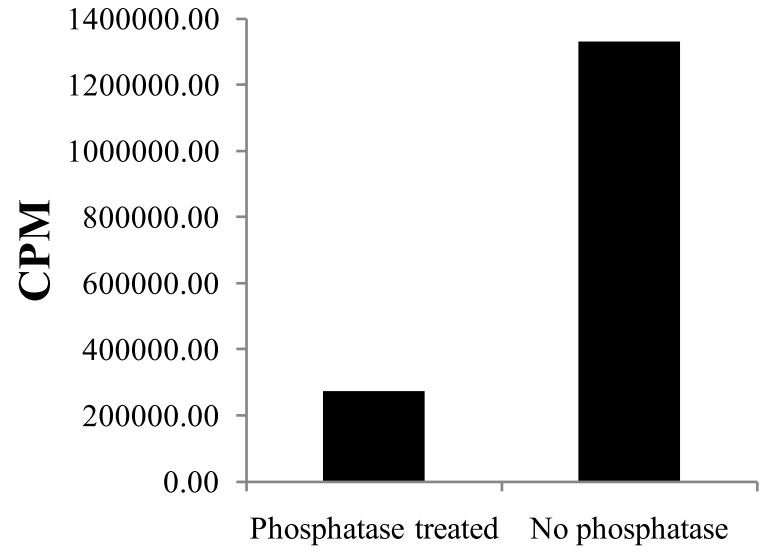

Supplemental Figure 2

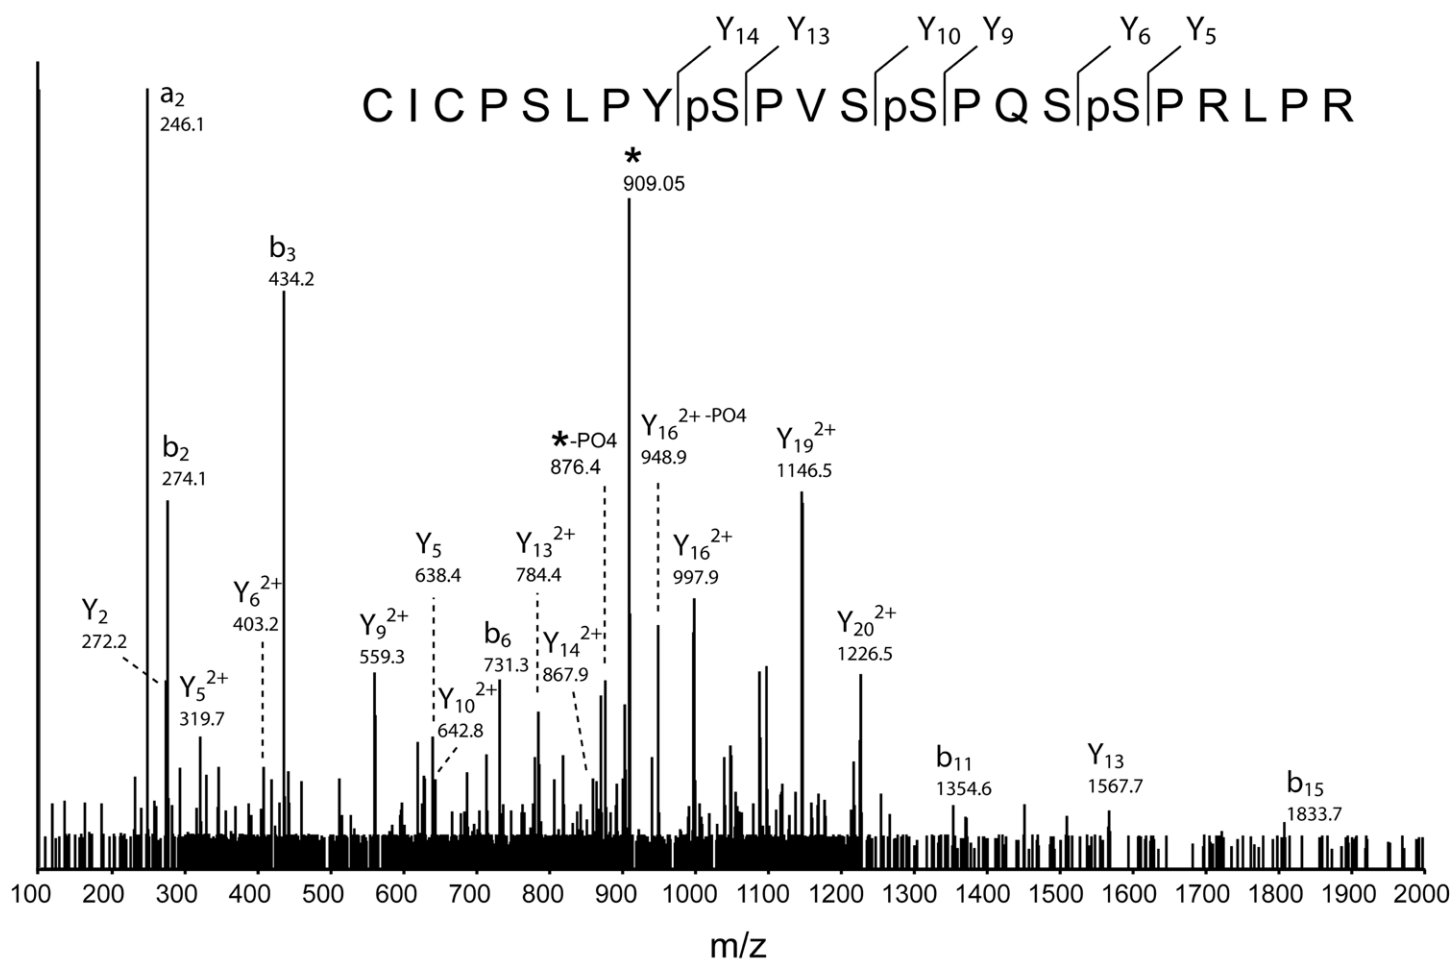

Supplemental Figure 3

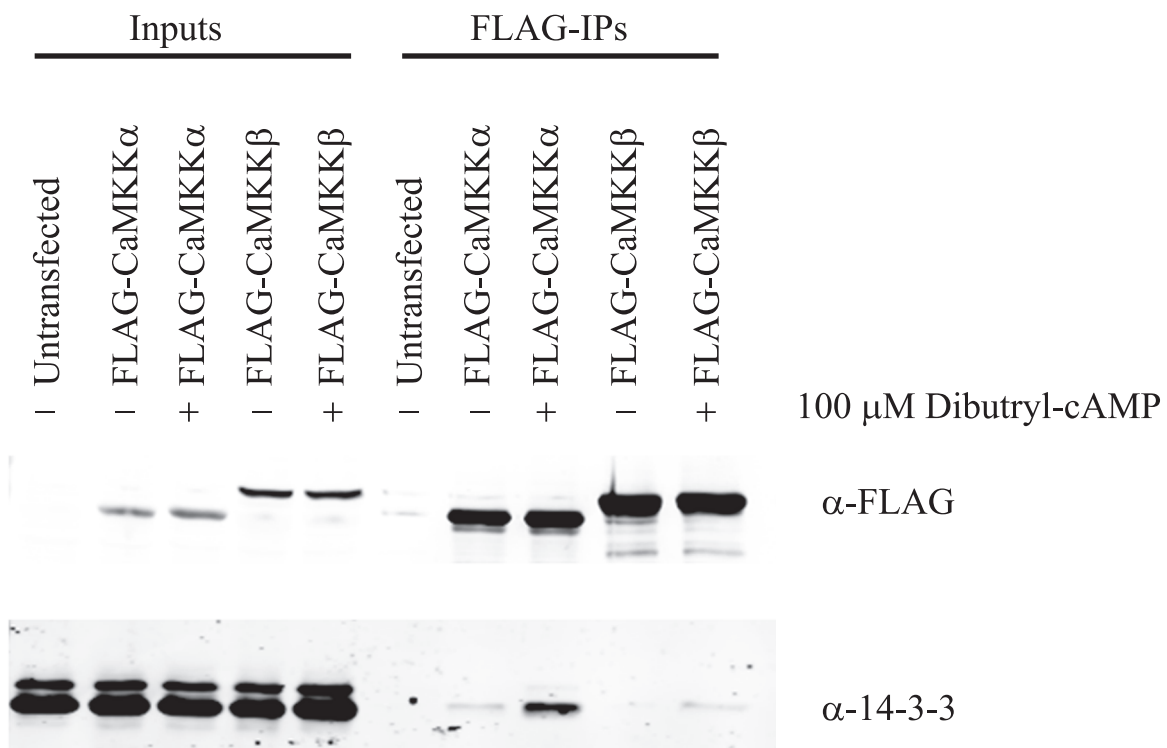

Supplemental Table 1

| Mutation                             | 5'-3' Forward Primer                                                        | 5'-3' Reverse Primer                                                        |
|--------------------------------------|-----------------------------------------------------------------------------|-----------------------------------------------------------------------------|
| CaMKK $\beta$ S129A                  | CCA TCC CTG TCC TAC GCA<br>CCA GCC AGC TCC CC                               | GGG GAG CTG GCT GGT GCG<br>TAG GAC AGG GAT GG                               |
| CaMKK $\beta$ S133A                  | C TAC TCA CCA GCC AGC GCC<br>CCA CAG TCC TCT C                              | GAG AGG ACT GTG GGG CGC<br>TGG CTG GTG AGTAG                                |
| CaMKK $\beta$ S137A                  | C AGC TCC CCA CAG TCC GCT<br>CCC CGG ATG CCC CGG                            | CCG GGG CAT CCG GGG AGC<br>GGA CTG TGG GGAGCTG                              |
| CaMKK $\beta$ S129A, S133A,<br>S137A | CCC TGT CCT ACG CAC<br>CAG CCA GCG CCC CAC<br>AGT CCG CTC CCC GGA<br>TGC CC | GGG CAT CCG GGG AGC<br>GGA CTG TGG GGC GCT<br>GGC TGG TGC GTA GGA<br>CAG GG |
| CaMKK $\beta$ S129D, S133D,<br>S137D | CCC TGT CCT ACG ATC CAG<br>CCA GCG ACC CAC AGT CCG<br>ATC CCC GGA TGC CC    | GGG CAT CCG GGG ATC GGA<br>CTG TGG GTC GCT GGC TGG<br>ATC GTA GGA CAG GG    |
| CaMKK $\beta$ D311A                  | GAA GAT CAT TCA CCG GGC<br>CAT CAA ACC CTC CAAC                             | GTT GGA GGG TTT GAT GGC<br>CCG GTG AAT GAT CTT C                            |
| AMPK $\alpha$ 1 D139A                | GGT GGT CCA CAG AGC TTT<br>GAA ACC TGAAA CG                                 | CGT TTT CAG GTT TCA AAG<br>CTC TGT GGA CCA CC                               |
